# Supplementary material
Source: Royal Society of Chemistry journal article supplement (doi:10.1039/d6qm00266h)
Supplement: d6qm00266h1.pdf [file d6qm00266h1.pdf]

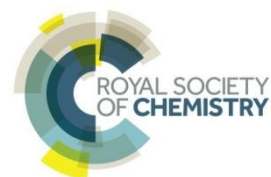

## Supporting Information

Synergistic Cobalt-Manganese Prussian Blue Analogues for Enhanced Polysulfide Conversion in Lithium-Sulfur Batteries

Kexin Yang, Yanjun Liu, Bolin Ma, Jie Wang, and Jiarui He\*

Email: [hejiarui123@sina.com](mailto:hejiarui123@sina.com)

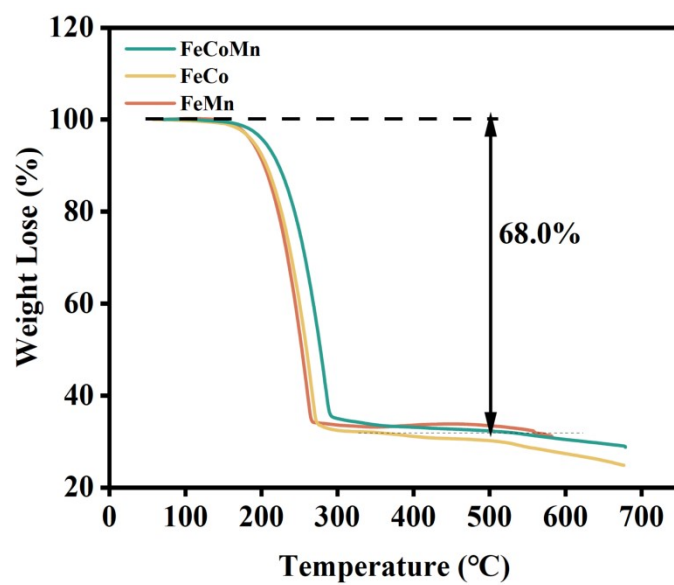

**Figure.S1** Thermogravimetric analysis (TGA) curves of FeCoMn-PBA/S, FeCo-PBA/S, and FeMn-PBA/S.

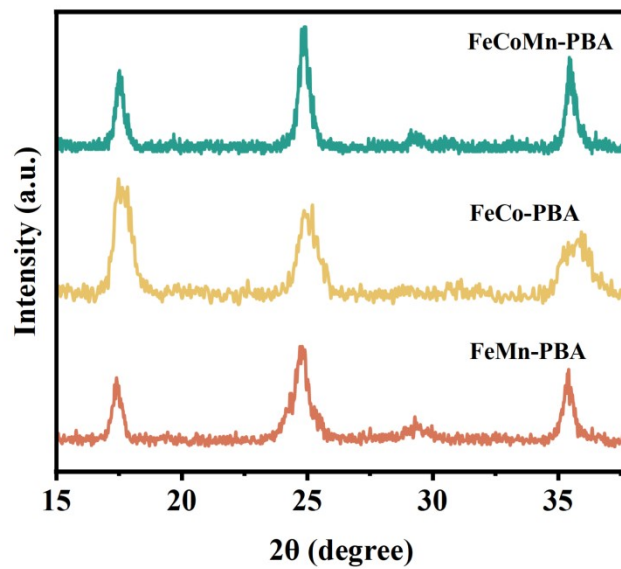

**Figure S2.** Refined XRD patterns of FeMn-PBA, FeCo-PBA, and FeCoMn-PBA.

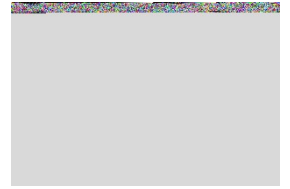

Electron Image 1 (SE)

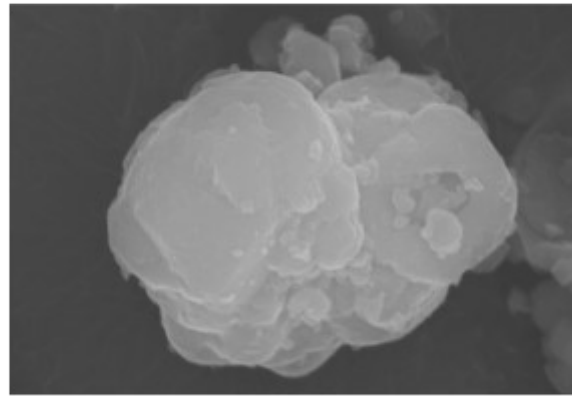

2.5μm

**Figure S3.** EDS elemental mapping overlay of FeCoMn-PBA/S.

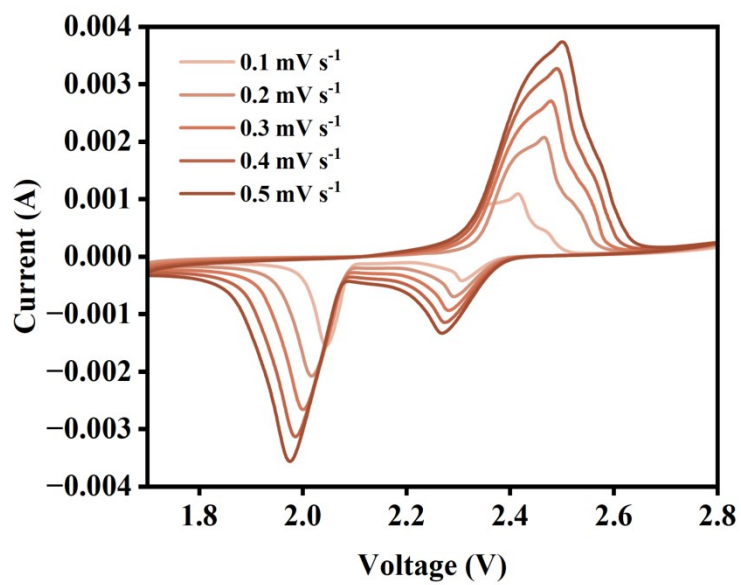

**Figure S4.** Consecutive CV curves of FeMn-PBA/S.

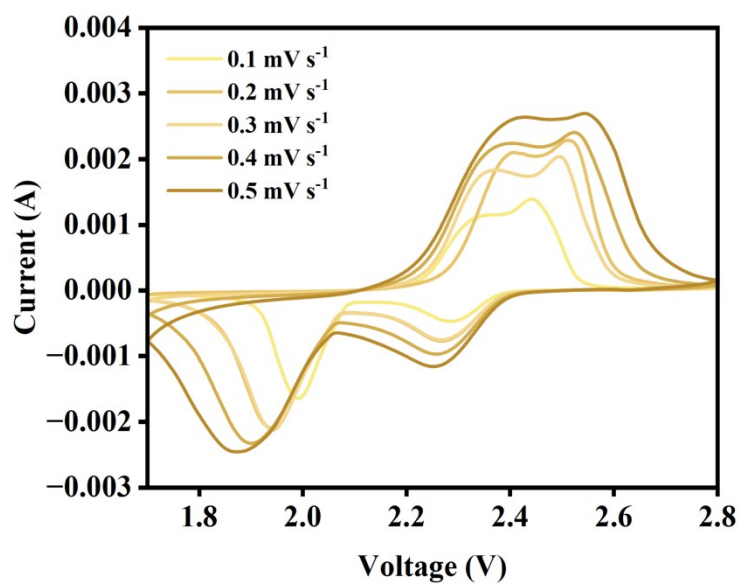

**Figure S5.** Consecutive CV curves of FeCo-PBA/S.

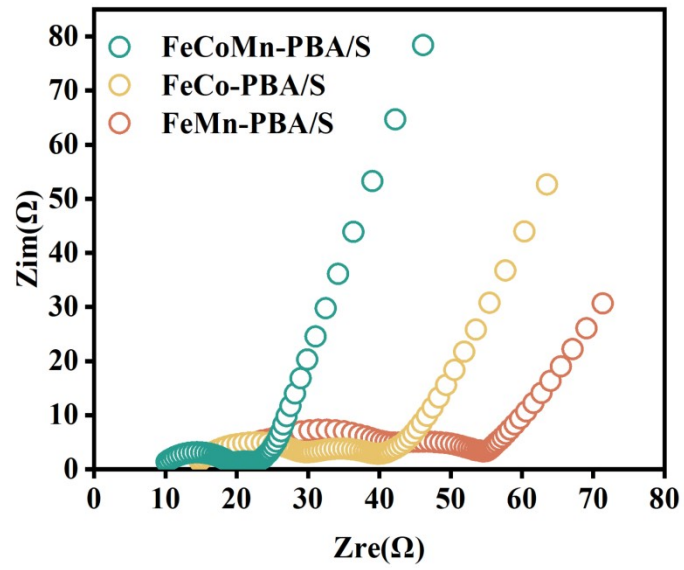

**Figure S6.** Electrochemical impedance spectroscopy (EIS) of FeCoMn-PBA/S, FeCo-PBA/S, and FeMn-PBA/S after charge/discharge cycling at 0.1 C.

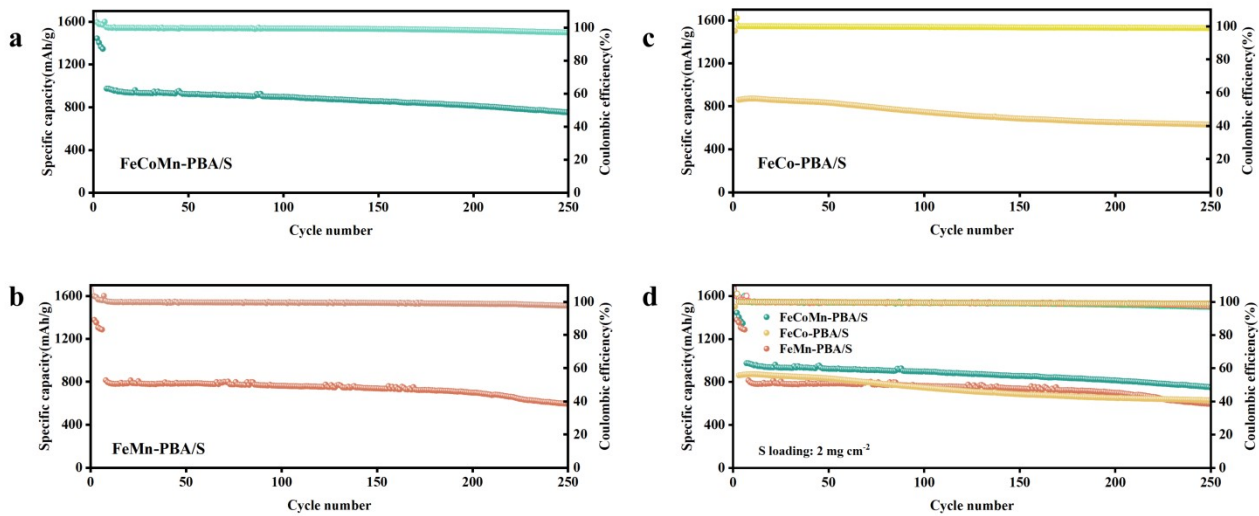

**Figure S7.** Long-term cycling performance of (a) FeCoMn-PBA/S, (b) FeMn-PBA/S, and (c) FeCo-PBA/S cathodes at 0.1 C.

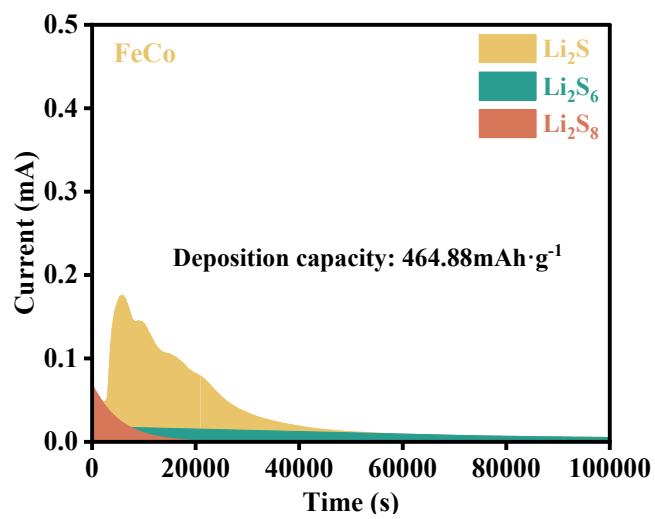

**Figure S8.** Potentiostatic discharge profiles for  $\text{Li}_2\text{S}$  deposition on FeCo-PBA/S.

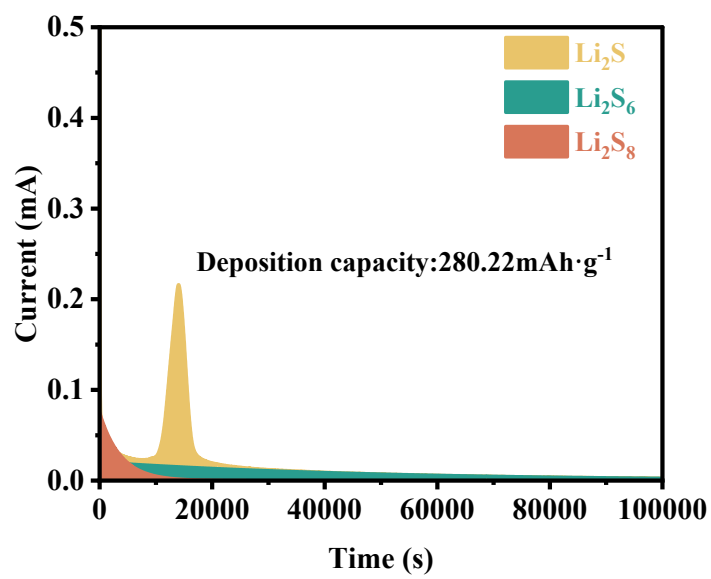

**Figure S9.** Potentiostatic discharge profiles for  $\text{Li}_2\text{S}$  deposition on S/C.

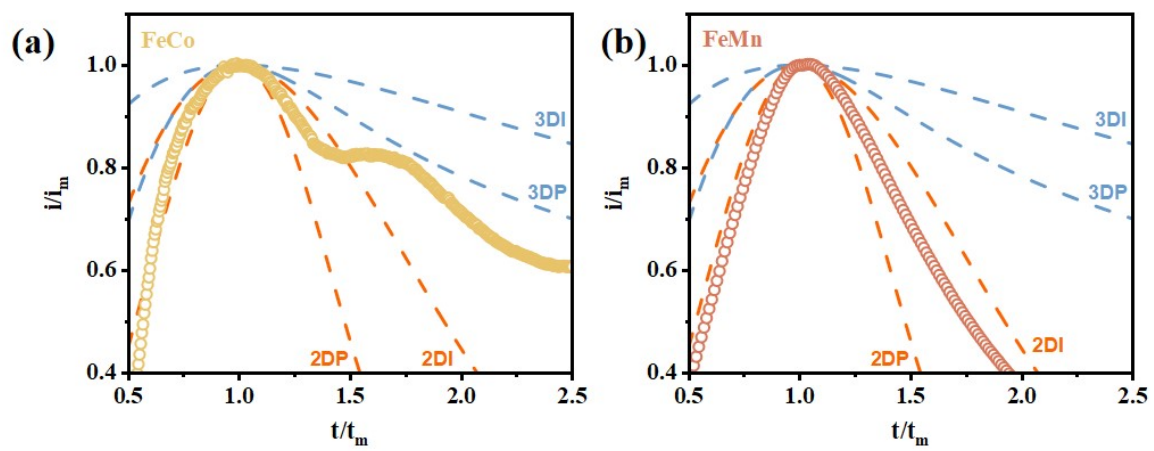

**Figure S10.** Dimensionless current-time transient profiles of (a) FeCo-PBA, and (b) FeMn-PBA compared with theoretical nucleation models.

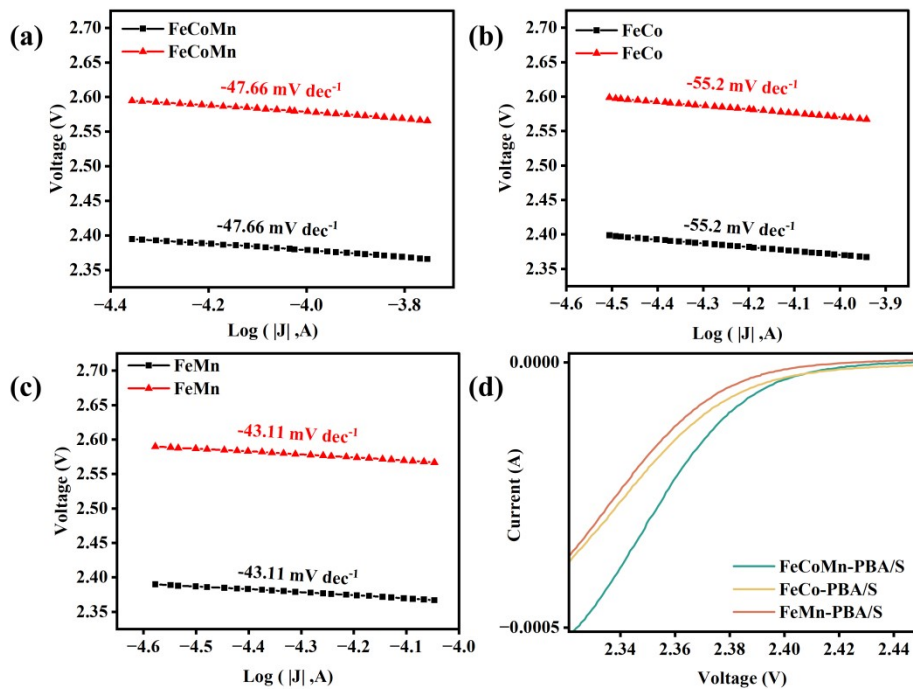

**Figure S11.** Electrochemical kinetic analysis of the different electrodes. Tafel plots of (a) FeCoMn-PBA/S, (b) FeCo-PBA/S, and (c) FeMn-PBA/S derived from the CV curves, respectively. (d) Zoomed-in view of the CV curves at the oxidation onset potential region to compare the reaction barriers.

| Materials    | $S_{\text{BET}}$ ( $\text{m}^2 \text{g}^{-1}$ ) | Distribution of pore size % |        |                    |
|--------------|-------------------------------------------------|-----------------------------|--------|--------------------|
|              |                                                 | $\leq 2\text{nm}$           | 2-50nm | $\geq 50\text{nm}$ |
| FeCoMn-PBA/S | 57.03                                           | 5.6                         | 71.8   | 22.6               |
| FeCo-PBA/S   | 11.63                                           | 5.7                         | 45.9   | 48.4               |
| FeMn-PBA/S   | 3.52                                            | 8.7                         | 53.7   | 37.6               |

**Table S1.** Pore size distributions of FeMn-PBA, FeCo-PBA, and FeCoMn-PBA.

| Materials                      | Consist            | Sulfur loading (mg cm <sup>-2</sup> ) | Initial capacity (mAh g <sup>-1</sup> , 0.1 C) | Rate capacity (mAh g <sup>-1</sup> )                                           | Retention ratio                            |
|--------------------------------|--------------------|---------------------------------------|------------------------------------------------|--------------------------------------------------------------------------------|--------------------------------------------|
| FeMn-PBA/S (This working)      | Fe, Mn             | 1.8-2.2                               | 1286.65 (0.1 C)                                | 0.1 C: 980.6;<br>0.2 C: 890.5;<br>0.5 C: 730.1;<br>1 C: 679.4;<br>2 C: 626.7   | 0.5 C/350 Cycle<br>59.72%                  |
| FeCo-PBA/S (This working)      | Fe, Co             | 1.8-2.2                               | 1185.12 (0.1 C)                                | 0.1 C: 1043.6;<br>0.2 C: 961.4;<br>0.5 C: 866.4;<br>1 C: 796.7;<br>2 C: 725.8  | 0.5 C/350 Cycle<br>53.0%                   |
| FeCoMn-PBA/S (This working)    | Fe, Co, Mn         | 1.8-2.2                               | 1365.52 (0.1 C)                                | 0.1 C: 1114.8;<br>0.2 C: 1051.6;<br>0.5 C: 966.7;<br>1 C: 907.4;<br>2 C: 836.9 | 1 C/500 Cycle<br>66.4%                     |
| FeCoNi-PBA/S/PPy (2021)        | Fe, Co, Ni         | 1.2-1.4                               | 1369.3 (0.1 C)                                 | 0.5 C: 490                                                                     | 0.1 C/100 Cycle<br>51.4%                   |
| FeCoNi-PBA/S (2021)            | Fe, Co, Ni         | —                                     | 1234.7 (0.1 C)                                 | 0.5 C: 360                                                                     | 0.1 C/100 Cycle<br>36.5%                   |
| FeCo-PBA/S (2021)              | Fe, Co             | —                                     | 1029.4 (0.1 C)                                 | 0.5 C: 250                                                                     | 0.1 C/100 Cycle<br>36.0%                   |
| FeNi-PBA/S (2021)              | Fe, Ni             | —                                     | 1303.2 (0.1 C)                                 | 0.5 C: 186                                                                     | 0.1 C/100 Cycle<br>15.9%                   |
| FeCo-PBA/S (2022)              | Fe, Co             | —                                     | —                                              | 5 A g <sup>-1</sup> (5 C: 811.86)                                              | 2 C/100 Cycle<br>789.7 mAh g <sup>-1</sup> |
| FeMn-PBA@rGO (2024)            | Fe, Mn             | —                                     | 1145 (0.2 C)                                   | —                                                                              | —                                          |
| Defect-rich FeCoPBA/S (2024)   | Fe, Co             | 5.0 (High sulfur loading)             | —                                              | 5 C: 583                                                                       | 2 C/2000 Cycle<br>64.3%                    |
| HE-PBA (2024, (Mn/Co/Ni/Cu/Zn) | Mn, Co, Ni, Cu, Zn | —                                     | —                                              | —                                                                              | 2 C/1000 Cycle<br>0.05%/Cycle              |

**Table S2.** A comparison with previously reported PBA-based sulfur hosts.



| Materials    | Capacity (mAh) | Weight (g) | Specific capacity (mAh g <sup>-1</sup> ) |
|--------------|----------------|------------|------------------------------------------|
| FeCoMn-PBA/S | 0.52           | 0.00128    | 406.69                                   |
| FeCo-PBA/S   | 0.21           | 0.00128    | 165.15                                   |
| FeMn-PBA/S   | 0.59           | 0.00128    | 464.88                                   |
| S/C          | 0.21           | 0.00128    | 280.22                                   |

**Table S3.** Calculation of Li<sub>2</sub>S deposition capacities on different PBA electrodes.



| Materials    | Nucleation overpotential (mV) | Activation overpotential (mV) |
|--------------|-------------------------------|-------------------------------|
| FeCoMn-PBA/S | 63.01                         | 121.54                        |
| FeCo-PBA/S   | 66.52                         | 111.68                        |
| FeMn-PBA/S   | 44.82                         | 219.32                        |

**Table S4.** Nucleation and activation overpotentials of different electrodes derived from GITT measurements.
